# Supplementary material for: Isolation and characterization of the E. coli membrane protein production strain Mutant56(DE3)
Source: PubMed Central journal article supplement (PMC5364489; doi:10.1038/srep45089), 2017-03-24
Supplement: srep45089-s1.pdf [file srep45089-s1.pdf]

**Supplementary Information**

**Isolation and characterization of the *E. coli* membrane  
protein production strain Mutant56(DE3)**

Thomas Baumgarten, Susan Schlegel, Samuel Wagner, Mirjam Löw, Jonas Eriksson, Ida Bonde, Markus J. Herrgård, Hermann J. Heipieper, Morten H. H. Nørholm, Dirk Jan Slotboom, Jan-Willem de Gier

**Supplementary Table 1. Characteristics of the membrane proteins used for the screen in Fig. 3 and for the screen in Supplementary Figure 4.**

The information listed; the names of the membrane proteins used, assigned or predicted function, length (number of amino acids) and number of transmembrane helices (TMs). All membrane proteins are from *E. coli* and have a C<sub>in</sub> topology<sup>1</sup>.

| Protein | Function                                        | Length (amino acids) | Number of TMs |
|---------|-------------------------------------------------|----------------------|---------------|
| YidC    | inner membrane protein insertase                | 548                  | 6             |
| RarD    | putative multidrug resistance protein           | 296                  | 9             |
| EnvZ    | sensore histidine kinase                        | 450                  | 2             |
| GlhP    | glutamate/aspartate transporter                 | 437                  | 8             |
| PheP    | phenylalanine transporter                       | 458                  | 12            |
| YiaM    | 2,3-diketo-L-gulonate Na <sup>+</sup> symporter | 157                  | 4             |
| YfbF    | undecaprenyl phosphate-L-Ara4FN transferase     | 322                  | 2             |
| TatC    | twin arginine protein translocation system      | 258                  | 6             |
| YjiY    | predicted peptide transporter                   | 716                  | 16            |

**Reference**

- 1 Daley, D. O. *et al.* Global topology analysis of the *Escherichia coli* inner membrane proteome. *Science* **308**, 1321-1323 (2005).

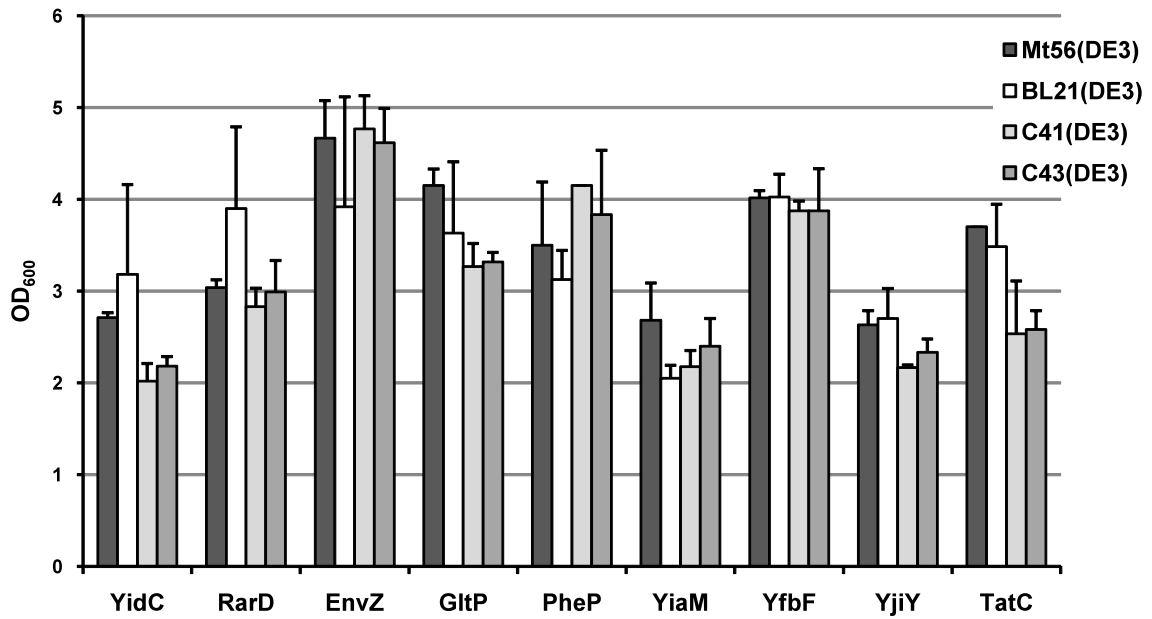

**Supplementary Figure 1. Screening the production of membrane proteins in Mt56(DE3), BL21(DE3), C41(DE3) and C43(DE3).** Biomass formation in Mt56(DE3), BL21(DE3), C41(DE3) and C43(DE3)-based cultures producing membrane proteins was monitored by measuring the OD<sub>600</sub> 24 h after the target gene expression was induced. The corresponding target membrane protein production levels can be found in Fig. 3. Bars represent the average of three independent experiments. Error bars represent the corresponding standard deviations.



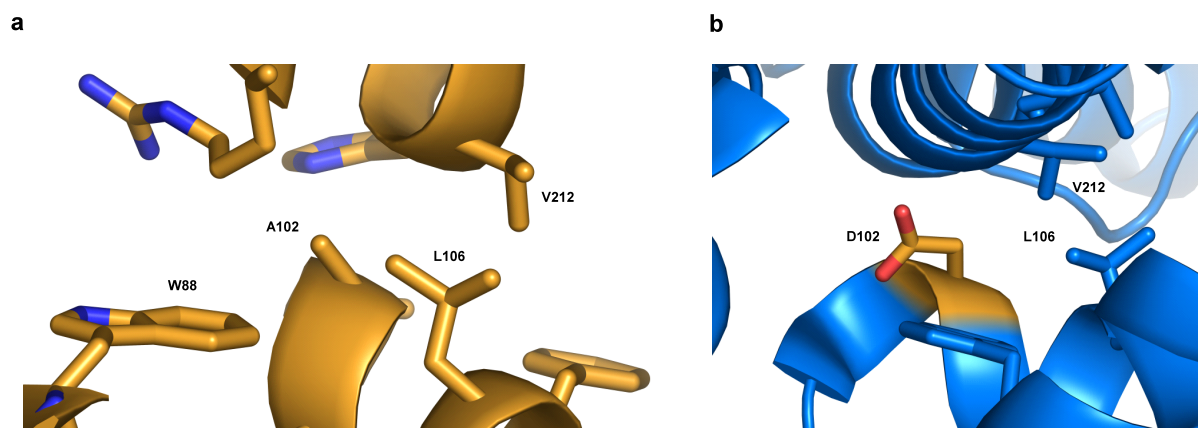

**Supplementary Figure 3. Positioning of the side chain of aspartate 102 in the Mt56 T7 RNAP.** The alanine 102 in the crystal structure of the wild-type T7 RNAP (PDB 3E2E) was replaced with an aspartate *in silico*. **(a)** Close up of position A102 in the crystal structure of the wild type T7 RNAP. The hydrophobic side chain of A102 forms hydrophobic interactions with L106 and V212, thereby stabilizing helix-helix interactions. **(b)** In the structure of the Mt56 T7 RNAP the aspartate 102 was placed in a position such that unfavorable interactions between its negatively charged side chain and the aforementioned hydrophobic residues are avoided.

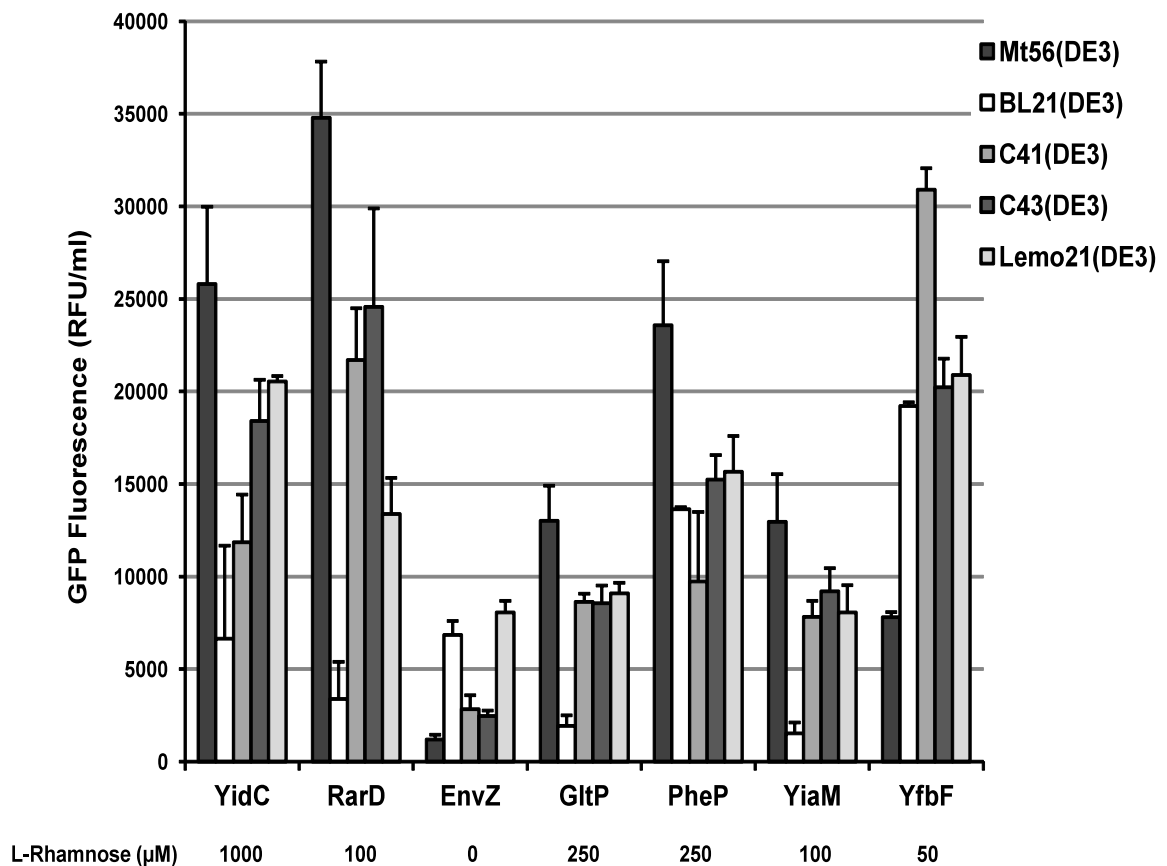

**Supplementary Figure 4. Screening the production of membrane proteins in Mt56(DE3), BL21(DE3), C41(DE3), C43(DE3) and Lemo21(DE3).** The production of a set of membrane protein GFP-fusions (Supplementary Table 1) was assessed in Mt56(DE3), BL21(DE3), C41(DE3), C43(DE3) and Lemo21(DE3). Cells were grown in LB medium at 30°C and target gene expression was induced at an OD<sub>600</sub> of ~0.4 by the addition of IPTG (0.4 mM). Membrane protein-GFP production was monitored by measuring GFP fluorescence per ml of culture 24 hours after the addition of IPTG (relative fluorescence unit, RFU). For the production in Lemo21(DE3) the optimal concentration of L-rhamnose is given for each target. Bars represent the average of three independent experiments. Error bars represent the corresponding standard deviations.
